# Supplementary material for: A biocompatible cross-linked fluorescent polymer prepared via ring-opening PEGylation of 4-arm PEG-amine, itaconic anhydride, and an AIE monomer
Source: Royal Society of Chemistry journal article supplement (doi:10.1039/c5py00111k), 2015-01-01
Supplement: c5py00111k1.pdf [file c5py00111k1.pdf]

## Supporting information

Biocompatible dendrimeric fluorescent polymer prepared *via*  
ring-opening PEGylation of 4-arm PEG-amine, itaconic  
anhydride, and an AIE monomer

Chunping Ma<sup>\*a</sup>, Xiqi Zhang<sup>\*b,c</sup>, Ke Wang<sup>b</sup>, Xiaoyong Zhang<sup>b</sup>, Yahong Zhou<sup>c</sup>, Hongliang Liu<sup>c</sup>,

Yen Wei<sup>\*b</sup>

<sup>a</sup> College of Materials & Metallurgical Engineering, Guizhou Institute of Technology, Guiyang,  
550003, P. R. China.

<sup>b</sup> Department of Chemistry and the Tsinghua Center for Frontier Polymer Research, Tsinghua  
University, Beijing, 100084, P. R. China.

<sup>c</sup> Laboratory of Bio-Inspired Smart Interface Science, Technical Institute of Physics and  
Chemistry, Chinese Academy of Sciences, Beijing, 100190, P. R. China.

E-mail: [machunpingaa@126.com](mailto:machunpingaa@126.com); [xqzhang@mail.ipc.ac.cn](mailto:xqzhang@mail.ipc.ac.cn); [weiyen@tsinghua.edu.cn](mailto:weiyen@tsinghua.edu.cn)

## Results

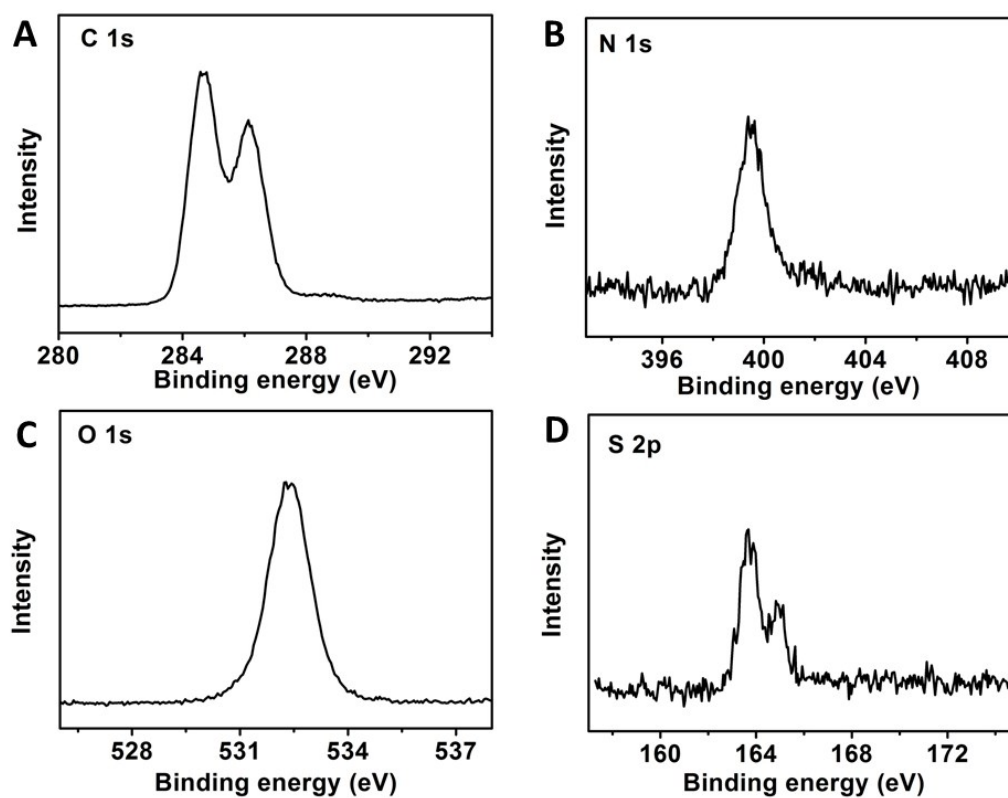

**Fig. S1** XPS spectra of PhE-ITA-PEG FPNs: (A) C 1s spectrum; (B) N 1s spectrum; (C) O 1s spectrum; (D) S 2p spectrum.

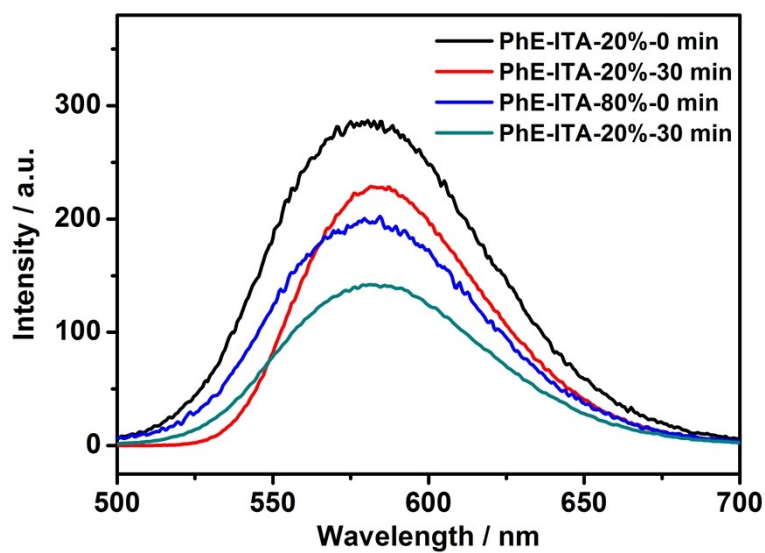

**Fig. S2** PL spectra of PhE-ITA-20% (80%) FPNs before and after they were irradiated with UV lamp at 365 nm for 30 min.
